# Supplementary material
Source: PubMed Central journal article supplement (PMC3509766)

# Supplemental Figure S2

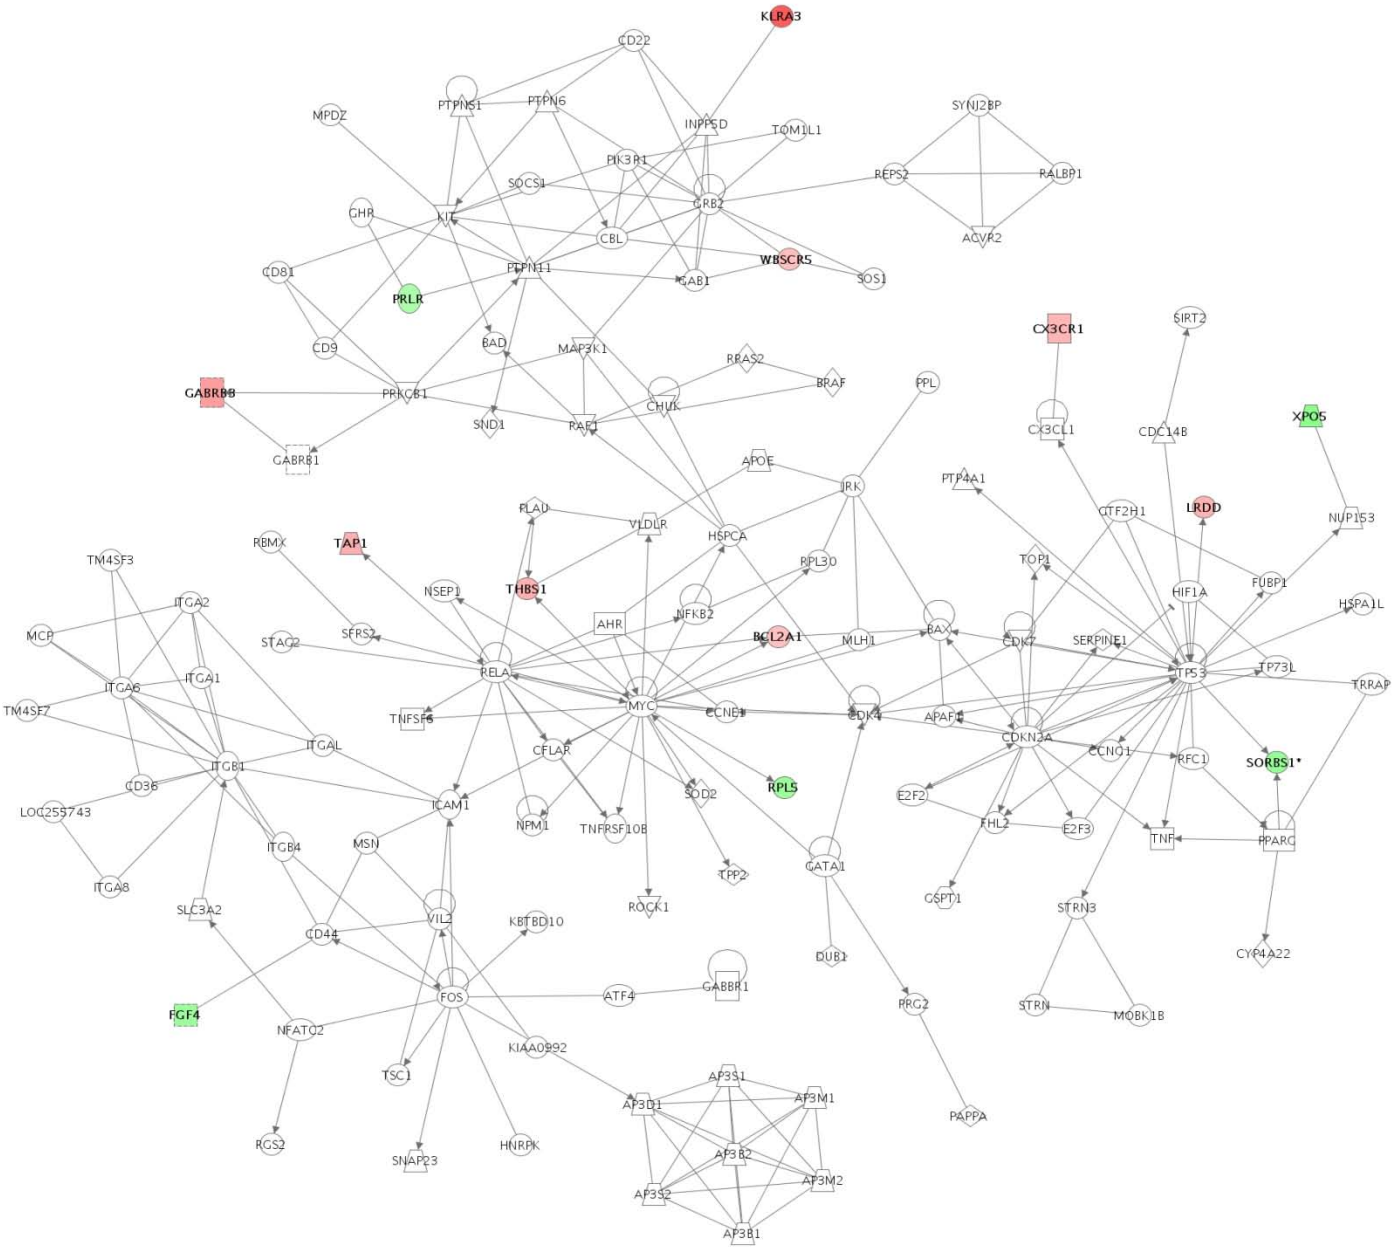

Supplement: mmc2.pdf [file mmc2.pdf]

# Supplemental Figure S3

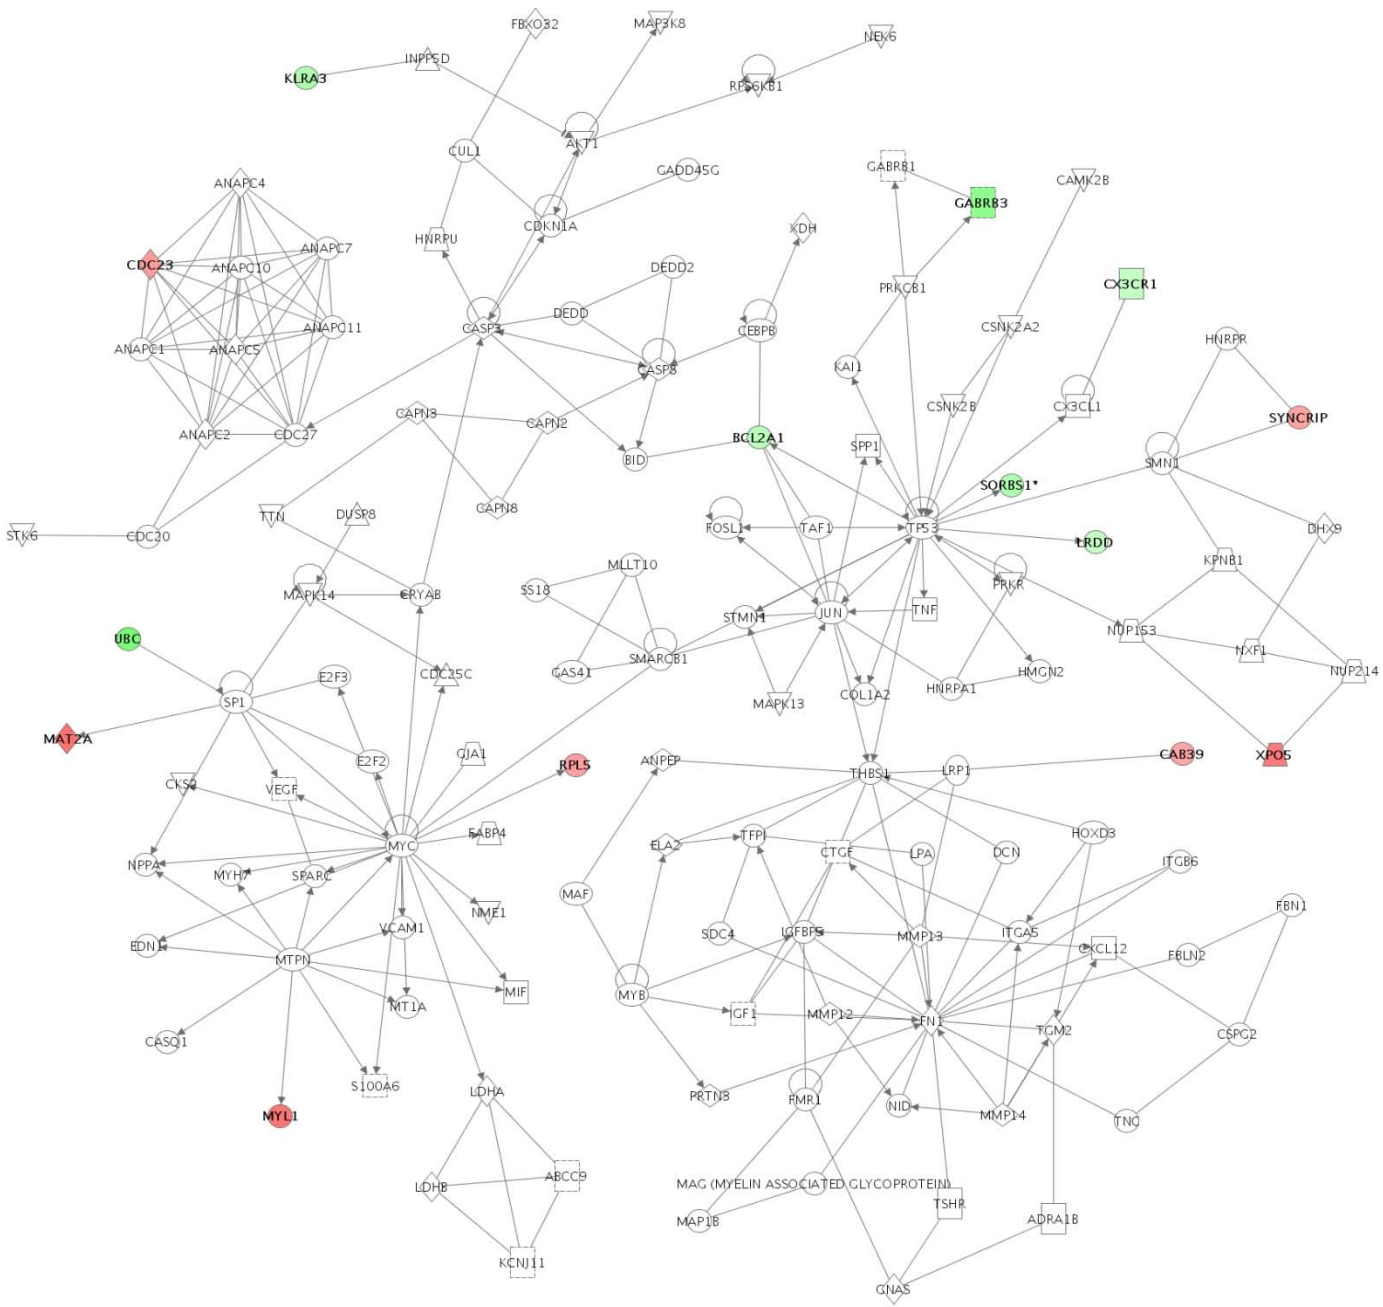

Supplement: mmc3.pdf [file mmc3.pdf]
